# Supplementary material
Source: publisher site journal article supplement (https://www.dovepress.com/article/supplementary_file/594240/594240%20Supplementary%20Materials_1.docx)
Supplement: Supplementary file 1 [file 594240%20Supplementary%20Materials_1.docx]

**Supplementary Materials**

**Supplementary Methods 1: PCR condition for *Cryptococcus* variant identification**

Primers:
Forward primer ITS1: 5'-TCCGTAGGTGAACCTGCGG-3'
Reverse primer ITS4: 5'-TCCTCCGCTTATTGATATGC-3'

**PCR reaction system for *Cryptococcus* variant identification**

| Component | Volume (μL) |
| --- | --- |
| 2X EasyTaq PCR SuperMix (+dye) | 25 |
| DNA (20 ng) | 2 |
| ITS1 (5 μmol/L) | 2 |
| ITS4 (5 μmol/L) | 2 |
| ddH2O | 19 |
| Total | 50 |

PCR Reaction Conditions:

Initial denaturation: 94°C for 5 minutes.

Denaturation: 94°C for 60 seconds.

Annealing: 50°C for 60 seconds.

Extension: 72°C for 60 seconds.

Repeat steps 2-4 for 30 cycles.

Final extension: 72°C for 10 minut**es.**

**Supplementary Methods 2: PCR condition for *Cryptococcus* genotype identification**

Primers:

For the Cryptococcus neoformans:

Forward primer CNF: 5'-AAGCCTCTCATCCATATCTT-3'

Reverse primer CNR: 5'-TTCAACCACGAATATGTA-3'

**PCR condition for *Cryptococcus* genotype identification**

| Component | Volume (μL) |
| --- | --- |
| 2X EasyTaq PCR SuperMix (+dye) | 25 |
| DNA (20 ng) | 2 |
| CNF/CGF (5 μmol/L) | 2 |
| CNF/CGR (5 μmol/L) | 2 |
| ddH2O | 19 |
| Total | 50 |

PCR Reaction Conditions:

Initial denaturation: 94°C for 3 minutes.

Denaturation: 94°C for 30 seconds.

Annealing: 52°C for 30 seconds.

Extension: 72°C for 1.5 minutes.

Repeat steps 2-4 for 35 cycles.

Final extension: 72°C for 10 minutes.

**Supplementary Methods 3: PCR condition for *Cryptococcus* Mating identification Identification**

Primers:

For **α-mating** type specific:

Forward primer α -mating-type-specific F: 5'-CTTCACTGCCATCTTCACCA-3'

Reverse primer α -mating-type-specific R: 5'-GACACAAAGGGTCATGCCA-3'

**Fragment size：101-bp**

For **a-mating** type specific:

Forward primer A- mating-type-specific F: 5'-CGCCTTCACTGCTACCTTCT-3'

Reverse primer A- mating-type-specific R: 5'-AACGCAAGAGTAAGTCGGGC-3'

**Fragment size：117-bp**

**PCR reaction system for *Cryptococcus* mating identification**

| Component | Volume (μL) |
| --- | --- |
| DNA (20 ng) | 2 |
| 2X EasyTaq PCR SuperMix (+dye) | 10 |
| α -mating primer F (5 μmol/L) | 1 |
| α -mating primer R (5 μmol/L) | 1 |
| ddH2O | 6 |
| Total | 20 |

**PCR Reaction Conditions:**

Initial denaturation: 95°C for 3 minutes.

Denaturation: 94°C for 1 minute.

Annealing: 57.5°C for 1 minute.

Extension: 72°C for 1 minute.

Repeat steps 2-4 for 30 cycles.

Final extension: 72°C for 10 minutes.

**Supplementary Methods 4:PCR condition for *Cryptococcus* MLST identification**

| **Gene** | **Primer (5'-3')** | **PCR Amplification Conditions:** | **Fragment size(bp)** |
| --- | --- | --- | --- |
| CAP59 | F :CTCTACGTCGAGCAAGTCAAG R:TCCGCTGCACAAGTGATACCC | 94°C3min;35cycles: 94°C30s, 56°C30s, 72°C1min; 72°C 10min | **559** |
| GPD1 | F:CCACCGAACCCTTCTAGGATA R:CTTCTTGGCACCTCCCTTGAG | 94°Cmin;35cycles: 94°C45s, 63°C1min, 72°C2min; 72°C 10min | **543** |
| IGS1 | F:ATCCTTTGCAGACGACTTGA R:GTGATCAGTGCATTGCATGA | 94°C3min;35cycles: 94°C30s, 60°C30s, 72°C1min; 72°C 10min | **723** |
| LAC1 | F:AACATGTTCCCTGGGCCTGTG R:ATGAGAATTGAATCGCCTTGT | 94°C3min;30cycles: 94°C30s, 58°C30s, 72°C 1min; 72°C 10min | **469** |
| PLB1 | F:CTTCAGGCGGAGAGAGGTTT R:GATTTGGCGTTGGTTTCAGT | 94°C3min;30cycles: 94°C45s, 61°C45s, 72°C1min; 72°C 10min | **532** |
| SOD1 | CNF:AAGCCTCCTCATCCATATTCTT CNR:TTCAACCACGAATATGTA CGF:GATCCTCACGCCATTACG CGR:GAATGATGCGCTTAGTTGGA | 94°C3min;35cycles: 94°C30s, 52°C30s, 72°C1.5min; 72°C 10min | **535** |
| URA5 | F:ATGTCCTCCCAAGCCCTCGAC R:TTAAGACCTCTGAACACCGTACTC | 94°C3min;35cycles: 94°C45s, 63°C1min， 72°C2min; 72°C 10min | **601** |

**Supplementary Figures**

*
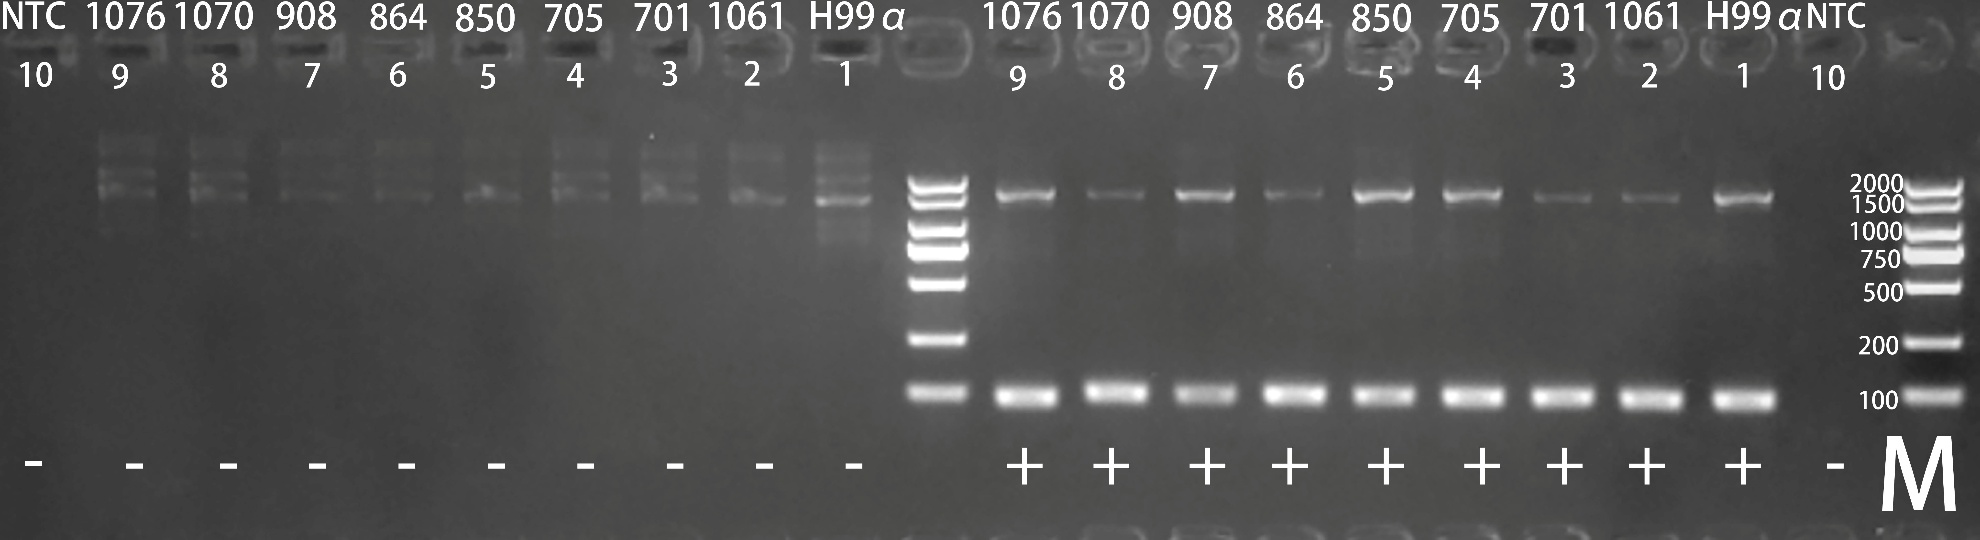
*

**Figure S1. PCR amplification for mating type determination of *C. neoformans* clinical isolates.**

M: DL2000 DNA Marker (fragment sizes: 100 bp, 250 bp, 500 bp, 750 bp, 1000 bp, 2000 bp); Lane 1: *C. neoformans* H99 (MATα) positive control. Lanes 2–9: Clinical isolates tested in this study (ID: 1061, 701, 705, 850, 864, 908, 1070, 1076). Lane 10: NTC (No-template control: nuclease-free water); "+" indicates amplification with MATα-specific primers; "-" indicates amplification with MATa-specific primers. The presence of a specific band only in the “+” lanes confirms the α mating type for all isolates.


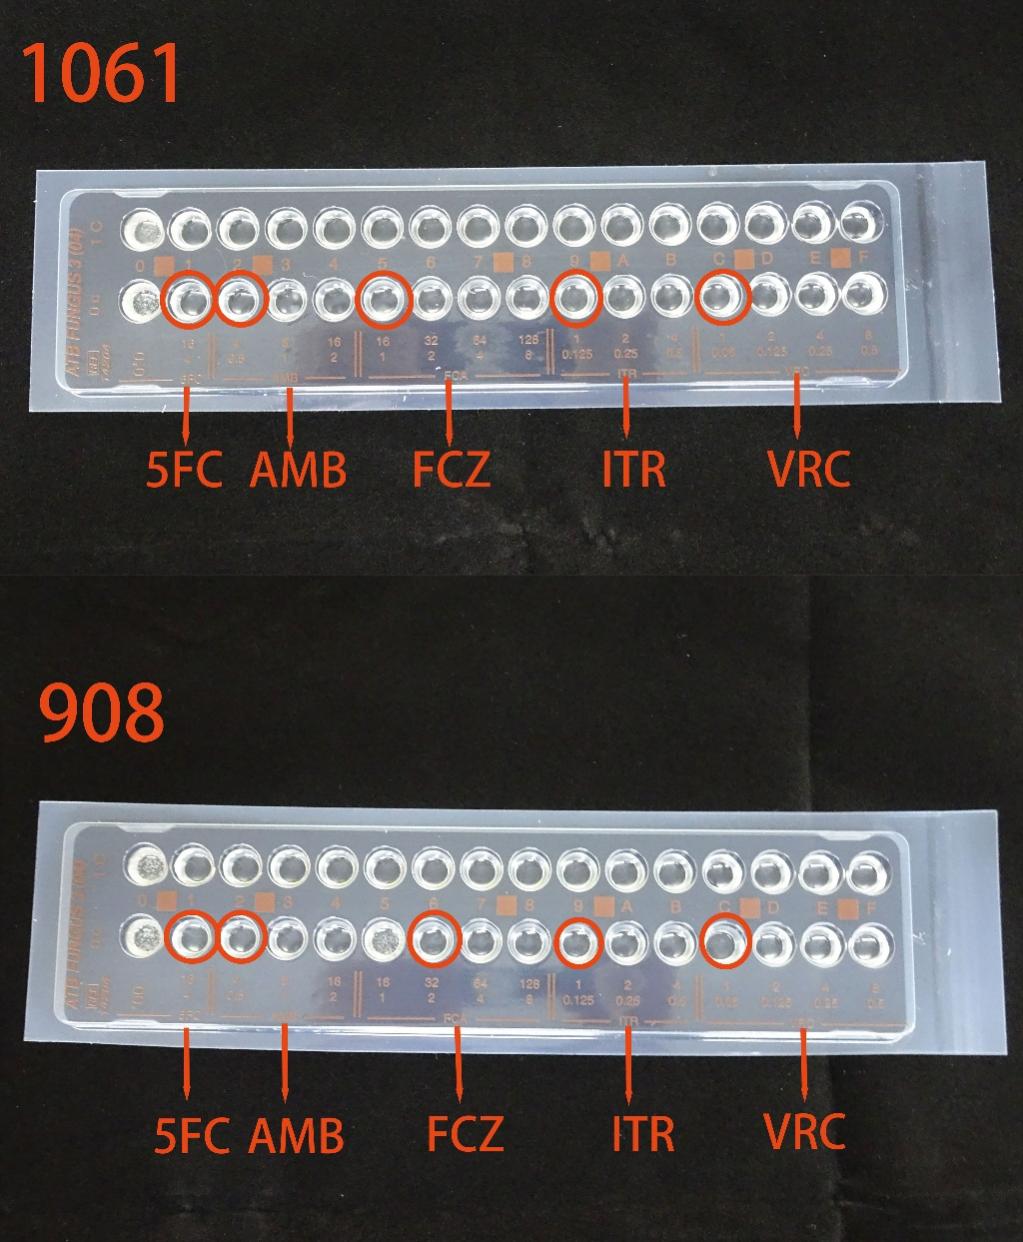


**Figure S2. Antifungal susceptibility testing of *C. neoformans* strains 1061 and 908 using the ATB FUNGUS 3 kit.**

Red solid circles indicate the specific wells of the microtiter plate corresponding to the minimum inhibitory concentration (MIC) of each antifungal agent. Both strains had identical MICs for 5-fluorocytosine (5-FC; ≤4 μg/mL), amphotericin B (AMB; ≤0.5 μg/mL), itraconazole (ITR; ≤0.125 μg/mL), and voriconazole (VCZ; ≤0.06 μg/mL). A difference was observed in fluconazole (FCZ) susceptibility, with MICs ≤1 μg/mL for strain 1061 and 2 μg/mL for strain 908.
